# Supplementary material for: Circulating brain-enriched microRNAs as novel biomarkers for detection and differentiation of neurodegenerative diseases
Source: PubMed Central journal article supplement (PMC5679501; doi:10.1186/s13195-017-0316-0), 2017-11-09
Supplement: 13195_2017_316_MOESM1_ESM.pdf [file 13195_2017_316_MOESM1_ESM.pdf]

Combined set   Confirmation set   Training set

| Group   | Female + Male |          |         |         |         | Female |          |         |         |         | Male |          |         |         |         |
|---------|---------------|----------|---------|---------|---------|--------|----------|---------|---------|---------|------|----------|---------|---------|---------|
|         | N             | Age Mean | Age STD | Age Min | Age Max | N      | Age Mean | Age STD | Age Min | Age Max | N    | Age Mean | Age STD | Age Min | Age Max |
| Control | 25            | 64.84    | 7.49    | 51      | 80      | 13     | 64.92    | 7.32    | 52      | 78      | 12   | 64.75    | 8.00    | 51      | 80      |
| AD      | 25            | 67.84    | 10.22   | 53      | 85      | 13     | 66.62    | 11.84   | 53      | 85      | 12   | 69.17    | 8.45    | 56      | 83      |
| FTD     | 25            | 63.04    | 7.24    | 46      | 76      | 12     | 62.25    | 7.81    | 46      | 72      | 13   | 63.77    | 6.92    | 54      | 76      |
| PD      | 25            | 67.08    | 7.63    | 54      | 82      | 7      | 71.00    | 3.87    | 65      | 77      | 18   | 65.56    | 8.25    | 54      | 82      |
| ALS     | 25            | 59.80    | 9.99    | 39      | 78      | 7      | 59.86    | 6.91    | 50      | 70      | 18   | 59.78    | 11.13   | 39      | 78      |
| Control | 25            | 65.08    | 11.81   | 25      | 83      | 13     | 59.30    | 11.81   | 25      | 70      | 12   | 71.33    | 8.37    | 57      | 83      |
| AD      | 25            | 67.68    | 10.82   | 54      | 87      | 13     | 66.84    | 11.51   | 54      | 84      | 12   | 68.58    | 10.46   | 56      | 87      |
| FTD     | 25            | 63.24    | 6.67    | 49      | 75      | 10     | 64.60    | 7.01    | 49      | 74      | 15   | 62.33    | 6.51    | 52      | 75      |
| PD      | 25            | 66.44    | 7.96    | 49      | 81      | 8      | 66.12    | 6.05    | 57      | 77      | 17   | 66.58    | 8.89    | 49      | 81      |
| ALS     | 25            | 59.48    | 11.71   | 29      | 83      | 7      | 59.57    | 13.24   | 40      | 83      | 18   | 59.44    | 11.48   | 29      | 74      |
| Control | 50            | 64.96    | 9.79    | 25      | 83      | 26     | 62.12    | 10.04   | 25      | 78      | 24   | 68.04    | 8.69    | 51      | 83      |
| AD      | 50            | 67.76    | 10.42   | 53      | 87      | 26     | 66.73    | 11.44   | 53      | 85      | 24   | 68.88    | 9.30    | 56      | 87      |
| FTD     | 50            | 63.14    | 6.89    | 46      | 76      | 22     | 63.32    | 7.38    | 46      | 74      | 28   | 63.00    | 6.62    | 52      | 76      |
| PD      | 50            | 66.76    | 7.73    | 49      | 82      | 15     | 68.40    | 5.58    | 57      | 77      | 35   | 66.06    | 8.46    | 49      | 82      |
| ALS     | 50            | 59.64    | 10.77   | 29      | 83      | 14     | 59.71    | 10.15   | 40      | 83      | 36   | 59.61    | 11.15   | 29      | 78      |

**Additional file 1. Age and sex distribution in AD, FTD, PD, ALS groups and control**
