# Supplementary material for: Circulating brain-enriched microRNAs as novel biomarkers for detection and differentiation of neurodegenerative diseases
Source: PubMed Central journal article supplement (PMC5679501; doi:10.1186/s13195-017-0316-0), 2017-11-09
Supplement: 13195_2017_316_MOESM4_ESM.pdf [file 13195_2017_316_MOESM4_ESM.pdf]

| Set                                                    | Training |      |       |      | Confirmation |      |       |      | Combined |      |       |      |
|--------------------------------------------------------|----------|------|-------|------|--------------|------|-------|------|----------|------|-------|------|
|                                                        | SENS     | SPEC | ACCUR | AUC  | SENS         | SPEC | ACCUR | AUC  | SENS     | SPEC | ACCUR | AUC  |
| miR-433 / miR-181a                                     | 0.6      | 0.8  | 0.7   | 0.76 | 0.68         | 0.72 | 0.7   | 0.81 | 0.8      | 0.64 | 0.72  | 0.77 |
| miR-329 / miR-874                                      | 0.72     | 0.88 | 0.8   | 0.86 | 0.64         | 0.48 | 0.56  | 0.67 | 0.8      | 0.63 | 0.72  | 0.75 |
| miR-329 / miR-181a                                     | 0.8      | 0.75 | 0.78  | 0.86 | 0.64         | 0.76 | 0.7   | 0.82 | 0.64     | 0.86 | 0.75  | 0.82 |
| miR-329 / let-7e                                       | 0.84     | 0.83 | 0.84  | 0.91 | 0.64         | 0.52 | 0.58  | 0.59 | 0.72     | 0.69 | 0.71  | 0.77 |
| miR-329 / miR-146a                                     | 0.76     | 0.71 | 0.73  | 0.78 | 0.72         | 0.6  | 0.66  | 0.76 | 0.64     | 0.78 | 0.71  | 0.76 |
| miR-329 / miR-411                                      | 0.52     | 0.83 | 0.67  | 0.71 | 0.76         | 0.72 | 0.74  | 0.83 | 0.7      | 0.73 | 0.72  | 0.76 |
| miR-127-3p / miR-181a                                  | 0.64     | 0.76 | 0.7   | 0.74 | 0.76         | 0.76 | 0.76  | 0.83 | 0.64     | 0.74 | 0.69  | 0.75 |
| miR-99b / miR-874                                      | 0.92     | 0.6  | 0.76  | 0.79 | 0.48         | 0.6  | 0.54  | 0.73 | 0.9      | 0.54 | 0.72  | 0.76 |
| miR-99b / miR-181a                                     | 0.6      | 0.8  | 0.7   | 0.76 | 0.8          | 0.84 | 0.82  | 0.94 | 0.68     | 0.84 | 0.76  | 0.86 |
| miR-99b / let-7e                                       | 0.88     | 0.8  | 0.84  | 0.94 | 0.72         | 0.72 | 0.72  | 0.84 | 0.7      | 0.8  | 0.75  | 0.84 |
| miR-99b / miR-128a                                     | 0.76     | 0.64 | 0.7   | 0.79 | 0.52         | 0.72 | 0.62  | 0.76 | 0.7      | 0.72 | 0.71  | 0.76 |
| miR-107 / miR-181a                                     | 0.76     | 0.76 | 0.76  | 0.85 | 0.68         | 0.72 | 0.7   | 0.85 | 0.78     | 0.68 | 0.73  | 0.79 |
| miR-107 / let-7e                                       | 1        | 0.84 | 0.92  | 0.97 | 0.36         | 0.52 | 0.44  | 0.52 | 0.92     | 0.56 | 0.74  | 0.79 |
| miR-107 / miR-146a                                     | 0.56     | 0.88 | 0.72  | 0.81 | 0.68         | 0.72 | 0.7   | 0.83 | 0.7      | 0.76 | 0.73  | 0.81 |
| miR-9* / miR-16                                        | 0.76     | 0.6  | 0.68  | 0.73 | 0.76         | 0.68 | 0.72  | 0.83 | 0.7      | 0.7  | 0.7   | 0.76 |
| miR-9* / miR-874                                       | 0.8      | 0.92 | 0.86  | 0.92 | 0.72         | 0.72 | 0.72  | 0.81 | 0.84     | 0.72 | 0.78  | 0.83 |
| miR-9* / miR-29a                                       | 0.72     | 0.6  | 0.66  | 0.67 | 0.84         | 0.84 | 0.84  | 0.93 | 0.78     | 0.74 | 0.76  | 0.79 |
| miR-9* / miR-155                                       | 0.88     | 0.72 | 0.8   | 0.76 | 0.76         | 0.72 | 0.74  | 0.86 | 0.7      | 0.72 | 0.71  | 0.79 |
| miR-7 / miR-16                                         | 0.92     | 0.8  | 0.86  | 0.93 | 0.68         | 0.72 | 0.7   | 0.87 | 0.8      | 0.74 | 0.77  | 0.81 |
| miR-7 / miR-874                                        | 0.68     | 0.92 | 0.8   | 0.84 | 0.6          | 0.64 | 0.62  | 0.68 | 0.72     | 0.68 | 0.7   | 0.75 |
| miR-7 / miR-451                                        | 0.8      | 0.88 | 0.84  | 0.93 | 0.6          | 0.64 | 0.62  | 0.68 | 0.86     | 0.56 | 0.71  | 0.79 |
| miR-125b / miR-874                                     | 0.88     | 0.72 | 0.8   | 0.89 | 0.72         | 0.68 | 0.7   | 0.7  | 0.7      | 0.76 | 0.73  | 0.8  |
| miR-107 / miR-146a & miR-9* / miR-155                  | 0.76     | 0.84 | 0.8   | 0.9  | 0.88         | 0.84 | 0.86  | 0.92 | 0.84     | 0.8  | 0.82  | 0.9  |
| miR-99b / miR-874 & miR-9* / miR-155                   | 0.88     | 0.92 | 0.9   | 0.94 | 0.88         | 0.8  | 0.84  | 0.9  | 0.86     | 0.92 | 0.89  | 0.91 |
| miR-9* / miR-16 & miR-7 / miR-874                      | 0.84     | 0.92 | 0.88  | 0.97 | 0.92         | 0.88 | 0.9   | 0.95 | 0.86     | 0.94 | 0.9   | 0.96 |
| miR-329 / miR-181a & miR-9* / miR-16 & miR-7 / miR-874 | 0.84     | 0.92 | 0.88  | 0.95 | 0.84         | 0.88 | 0.86  | 0.94 | 0.92     | 0.78 | 0.85  | 0.95 |
| miR-107 / miR-181a & miR-9* / miR-16 & miR-7 / miR-874 | 0.84     | 0.88 | 0.86  | 0.95 | 0.92         | 0.8  | 0.86  | 0.94 | 0.92     | 0.78 | 0.85  | 0.95 |
| miR-107 / miR-146a & miR-9* / miR-16 & miR-7 / miR-874 | 0.88     | 0.8  | 0.84  | 0.94 | 0.88         | 0.88 | 0.88  | 0.95 | 0.86     | 0.88 | 0.87  | 0.95 |
| miR-99b / miR-128a & miR-9* / miR-16 & miR-7 / miR-874 | 0.84     | 0.88 | 0.86  | 0.95 | 0.92         | 0.88 | 0.9   | 0.97 | 0.9      | 0.86 | 0.88  | 0.95 |

**Additional file 4. miRNA pairs and classifiers differentiating NDs from control in training, confirmation, and combined sets. A: AD vs. Control**

SENS: Sensitivity, SPEC: Specificity, ACCUR: Accuracy, AUC: Area under ROC curve.

| Set                                                        | Training |      |       |      | Confirmation |      |       |      | Combined |      |       |      |
|------------------------------------------------------------|----------|------|-------|------|--------------|------|-------|------|----------|------|-------|------|
|                                                            | SENS     | SPEC | ACCUR | AUC  | SENS         | SPEC | ACCUR | AUC  | SENS     | SPEC | ACCUR | AUC  |
| miR-9* / miR-181a                                          | 0.8      | 0.52 | 0.66  | 0.69 | 0.84         | 0.8  | 0.82  | 0.88 | 0.64     | 0.68 | 0.66  | 0.76 |
| miR-9* / miR-874                                           | 0.92     | 0.52 | 0.72  | 0.8  | 0.64         | 0.88 | 0.76  | 0.8  | 0.64     | 0.72 | 0.68  | 0.75 |
| miR-9* / miR-31                                            | 0.68     | 0.64 | 0.66  | 0.68 | 0.6          | 0.76 | 0.68  | 0.75 | 0.56     | 0.7  | 0.63  | 0.7  |
| miR-9* / miR-125b                                          | 0.6      | 0.76 | 0.68  | 0.76 | 0.76         | 0.84 | 0.8   | 0.81 | 0.72     | 0.58 | 0.65  | 0.75 |
| miR-9* / let-7e                                            | 0.88     | 0.68 | 0.78  | 0.85 | 0.88         | 0.64 | 0.76  | 0.76 | 0.72     | 0.7  | 0.71  | 0.79 |
| miR-9* / miR-155                                           | 0.76     | 0.72 | 0.74  | 0.8  | 0.72         | 0.92 | 0.82  | 0.85 | 0.7      | 0.72 | 0.71  | 0.82 |
| miR-9* / miR-9                                             | 0.68     | 0.68 | 0.68  | 0.71 | 0.84         | 0.6  | 0.72  | 0.78 | 0.62     | 0.68 | 0.65  | 0.71 |
| miR-9* / miR-146a                                          | 0.76     | 0.52 | 0.64  | 0.65 | 0.72         | 0.8  | 0.76  | 0.82 | 0.62     | 0.68 | 0.65  | 0.72 |
| miR-99b / miR-181a                                         | 0.24     | 0.92 | 0.58  | 0.6  | 0.72         | 0.92 | 0.82  | 0.91 | 0.74     | 0.64 | 0.69  | 0.77 |
| miR-99b / let-7e                                           | 0.68     | 0.76 | 0.72  | 0.83 | 0.56         | 0.92 | 0.74  | 0.76 | 0.74     | 0.74 | 0.74  | 0.77 |
| miR-7 / miR-874                                            | 0.76     | 1    | 0.88  | 0.96 | 0.32         | 0.68 | 0.5   | 0.45 | 0.64     | 0.66 | 0.65  | 0.73 |
| miR-7 / miR-451                                            | 0.84     | 0.72 | 0.78  | 0.89 | 0.72         | 0.6  | 0.66  | 0.64 | 0.64     | 0.66 | 0.65  | 0.75 |
| miR-323-3p / miR-134                                       | 0.64     | 0.92 | 0.78  | 0.81 | 0.44         | 0.96 | 0.7   | 0.7  | 0.72     | 0.62 | 0.67  | 0.73 |
| miR-335-5p / miR-181a                                      | 0.52     | 0.72 | 0.62  | 0.59 | 0.88         | 0.96 | 0.92  | 0.97 | 0.58     | 0.76 | 0.67  | 0.74 |
| miR-335-5p / let-7e                                        | 0.52     | 0.92 | 0.72  | 0.8  | 0.76         | 1    | 0.88  | 0.94 | 0.76     | 0.62 | 0.69  | 0.83 |
| miR-335-5p / miR-155                                       | 0.72     | 0.52 | 0.62  | 0.62 | 0.84         | 0.68 | 0.76  | 0.84 | 0.64     | 0.64 | 0.64  | 0.7  |
| miR-128a / miR-181a                                        | 0.72     | 0.6  | 0.66  | 0.66 | 0.76         | 0.88 | 0.82  | 0.92 | 0.74     | 0.72 | 0.73  | 0.8  |
| miR-128a / miR-874                                         | 0.84     | 0.48 | 0.66  | 0.71 | 0.8          | 0.6  | 0.7   | 0.72 | 0.56     | 0.68 | 0.62  | 0.7  |
| miR-128a / let-7e                                          | 0.88     | 0.92 | 0.9   | 0.96 | 0.64         | 0.76 | 0.7   | 0.73 | 0.58     | 0.72 | 0.65  | 0.73 |
| miR-107 / let-7e                                           | 0.8      | 0.84 | 0.82  | 0.87 | 0.64         | 0.48 | 0.56  | 0.52 | 0.76     | 0.58 | 0.67  | 0.71 |
| miR-338-3p / miR-181a                                      | 0.72     | 0.8  | 0.76  | 0.78 | 0.72         | 0.6  | 0.66  | 0.72 | 0.62     | 0.64 | 0.63  | 0.71 |
| miR-191-5p / let-7e                                        | 0.68     | 1    | 0.84  | 0.92 | 0.64         | 0.48 | 0.56  | 0.52 | 0.64     | 0.66 | 0.65  | 0.72 |
| miR-9* / let-7e & miR-335-5p / let-7e                      | 0.8      | 0.84 | 0.82  | 0.89 | 0.84         | 0.92 | 0.88  | 0.95 | 0.82     | 0.76 | 0.79  | 0.87 |
| miR-9* / miR-155 & miR-99b / let-7e                        | 0.92     | 0.8  | 0.86  | 0.89 | 0.6          | 0.96 | 0.78  | 0.86 | 0.72     | 0.86 | 0.79  | 0.87 |
| miR-9* / let-7e & miR-128a / miR-874                       | 0.8      | 1    | 0.9   | 0.96 | 0.68         | 0.88 | 0.78  | 0.87 | 0.74     | 0.94 | 0.84  | 0.91 |
| miR-9* / let-7e & miR-7 / miR-451 & miR-335-5p / let-7e    | 0.84     | 0.96 | 0.9   | 0.97 | 0.84         | 0.96 | 0.9   | 0.97 | 0.86     | 0.88 | 0.87  | 0.94 |
| miR-9* / let-7e & miR-335-5p / let-7e & miR-128a / miR-874 | 0.84     | 0.84 | 0.84  | 0.92 | 0.96         | 0.88 | 0.92  | 0.97 | 0.78     | 0.92 | 0.85  | 0.92 |
| miR-9* / miR-9 & miR-99b / let-7e & miR-335-5p / let-7e    | 0.88     | 0.88 | 0.88  | 0.91 | 0.76         | 1    | 0.88  | 0.95 | 0.84     | 0.88 | 0.86  | 0.93 |

| Set                                                               | Training |      |       |      | Confirmation |      |       |      | Combined |      |       |      |
|-------------------------------------------------------------------|----------|------|-------|------|--------------|------|-------|------|----------|------|-------|------|
|                                                                   | SENS     | SPEC | ACCUR | AUC  | SENS         | SPEC | ACCUR | AUC  | SENS     | SPEC | ACCUR | AUC  |
| miR-9* / miR-31                                                   | 0.67     | 0.64 | 0.65  | 0.74 | 0.88         | 0.92 | 0.9   | 0.98 | 0.82     | 0.74 | 0.78  | 0.85 |
| miR-9* / miR-138                                                  | 0.67     | 0.68 | 0.67  | 0.73 | 1            | 1    | 1     | 1    | 0.57     | 0.96 | 0.77  | 0.85 |
| miR-9* / miR-218                                                  | 0.63     | 0.6  | 0.61  | 0.65 | 0.88         | 0.96 | 0.92  | 0.98 | 0.59     | 0.92 | 0.76  | 0.83 |
| miR-9* / miR-129-3p                                               | 0.63     | 0.58 | 0.6   | 0.76 | 0.96         | 1    | 0.98  | 1    | 0.8      | 0.82 | 0.81  | 0.91 |
| miR-9* / miR-874                                                  | 0.79     | 0.64 | 0.71  | 0.82 | 0.92         | 1    | 0.96  | 1    | 0.51     | 1    | 0.76  | 0.84 |
| miR-9* / miR-204                                                  | 0.58     | 0.56 | 0.57  | 0.67 | 1            | 1    | 1     | 1    | 0.76     | 0.9  | 0.83  | 0.87 |
| miR-9* / miR-29a                                                  | 0.54     | 0.44 | 0.49  | 0.5  | 1            | 1    | 1     | 1    | 0.53     | 0.98 | 0.76  | 0.82 |
| miR-99b / miR-31                                                  | 0.64     | 0.76 | 0.7   | 0.82 | 0.72         | 0.8  | 0.76  | 0.88 | 0.86     | 0.72 | 0.79  | 0.84 |
| miR-99b / miR-138                                                 | 0.68     | 0.76 | 0.72  | 0.79 | 1            | 0.96 | 0.98  | 0.99 | 0.84     | 0.86 | 0.85  | 0.9  |
| miR-99b / miR-218                                                 | 0.63     | 0.68 | 0.65  | 0.73 | 0.8          | 0.8  | 0.8   | 0.9  | 0.86     | 0.7  | 0.78  | 0.8  |
| miR-99b / miR-129-3p                                              | 0.58     | 0.71 | 0.65  | 0.76 | 0.76         | 0.92 | 0.84  | 0.96 | 0.98     | 0.73 | 0.86  | 0.86 |
| miR-99b / miR-874                                                 | 0.76     | 0.72 | 0.74  | 0.86 | 0.92         | 0.84 | 0.88  | 0.97 | 0.8      | 0.8  | 0.8   | 0.9  |
| miR-99b / miR-125b                                                | 0.6      | 0.6  | 0.6   | 0.74 | 0.92         | 0.84 | 0.88  | 0.95 | 0.86     | 0.72 | 0.79  | 0.85 |
| miR-99b / miR-204                                                 | 0.72     | 0.64 | 0.68  | 0.8  | 0.8          | 0.96 | 0.88  | 0.99 | 0.96     | 0.72 | 0.84  | 0.86 |
| miR-99b / miR-338-3p                                              | 0.68     | 0.64 | 0.66  | 0.73 | 0.92         | 0.96 | 0.94  | 0.99 | 0.74     | 0.86 | 0.8   | 0.87 |
| miR-99b / miR-155                                                 | 0.64     | 0.68 | 0.66  | 0.74 | 0.96         | 0.8  | 0.88  | 0.99 | 0.92     | 0.7  | 0.81  | 0.88 |
| miR-99b / miR-29a                                                 | 0.68     | 0.68 | 0.68  | 0.73 | 0.92         | 0.76 | 0.84  | 0.96 | 0.78     | 0.76 | 0.77  | 0.81 |
| miR-99b / miR-181a                                                | 0.52     | 0.44 | 0.48  | 0.53 | 0.88         | 0.96 | 0.92  | 0.99 | 0.58     | 0.94 | 0.76  | 0.8  |
| miR-99b / let-7e                                                  | 0.68     | 0.64 | 0.66  | 0.74 | 0.96         | 1    | 0.98  | 1    | 0.7      | 0.98 | 0.84  | 0.89 |
| miR-99b / miR-9                                                   | 0.64     | 0.56 | 0.6   | 0.68 | 0.92         | 0.96 | 0.94  | 0.99 | 0.78     | 0.78 | 0.78  | 0.86 |
| miR-99b / miR-146a                                                | 0.6      | 0.52 | 0.56  | 0.66 | 1            | 0.88 | 0.94  | 0.99 | 0.76     | 0.7  | 0.73  | 0.82 |
| miR-99b / miR-128a                                                | 0.6      | 0.6  | 0.6   | 0.66 | 0.88         | 0.92 | 0.9   | 0.98 | 0.56     | 0.94 | 0.75  | 0.8  |
| miR-127-3p / miR-411                                              | 0.76     | 0.52 | 0.64  | 0.76 | 0.84         | 0.92 | 0.88  | 0.95 | 0.76     | 0.74 | 0.75  | 0.81 |
| miR-491-5p / miR-138                                              | 0.76     | 0.72 | 0.74  | 0.85 | 0.76         | 0.6  | 0.68  | 0.81 | 0.72     | 0.68 | 0.7   | 0.81 |
| miR-128a / miR-138                                                | 0.76     | 0.72 | 0.74  | 0.83 | 0.84         | 0.6  | 0.72  | 0.84 | 0.94     | 0.62 | 0.78  | 0.83 |
| miR-128a / miR-874                                                | 0.8      | 0.84 | 0.82  | 0.92 | 0.64         | 0.64 | 0.64  | 0.75 | 0.76     | 0.72 | 0.74  | 0.81 |
| miR-335-5p / miR-138                                              | 0.68     | 0.72 | 0.7   | 0.8  | 0.68         | 0.68 | 0.68  | 0.82 | 0.78     | 0.7  | 0.74  | 0.81 |
| miR-9* / miR-31 & miR-99b / miR-874                               | 0.92     | 0.56 | 0.74  | 0.82 | 0.96         | 0.92 | 0.94  | 0.99 | 0.94     | 0.7  | 0.82  | 0.91 |
| miR-99b / miR-874 & miR-127-3p / miR-411                          | 0.68     | 0.92 | 0.8   | 0.87 | 0.92         | 0.96 | 0.94  | 0.99 | 0.86     | 0.84 | 0.85  | 0.92 |
| miR-9* / miR-874 & miR-99b / miR-874 & miR-127-3p / miR-411       | 0.68     | 1    | 0.84  | 0.9  | 0.92         | 1    | 0.96  | 1    | 0.84     | 0.94 | 0.89  | 0.95 |
| miR-9* / miR-129-3p & miR-99b / miR-874 & miR-127-3p / miR-411    | 0.84     | 0.76 | 0.8   | 0.91 | 1            | 1    | 1     | 1    | 0.82     | 0.96 | 0.89  | 0.96 |
| miR-9* / miR-31 & miR-99b / miR-874 & miR-127-3p / miR-411        | 0.88     | 0.72 | 0.8   | 0.87 | 0.96         | 0.96 | 0.96  | 0.99 | 0.9      | 0.84 | 0.87  | 0.94 |
| miR-9* / miR-129-3p & miR-127-3p / miR-411 & miR-491-5p / miR-138 | 0.76     | 0.84 | 0.8   | 0.9  | 1            | 0.92 | 0.96  | 0.99 | 0.94     | 0.86 | 0.91  | 0.96 |

| Set                                                                   | Training |      |       |      | Confirmation |      |       |      | Combined |      |       |      |
|-----------------------------------------------------------------------|----------|------|-------|------|--------------|------|-------|------|----------|------|-------|------|
|                                                                       | SENS     | SPEC | ACCUR | AUC  | SENS         | SPEC | ACCUR | AUC  | SENS     | SPEC | ACCUR | AUC  |
| miR-206 / miR-31                                                      | 0.8      | 0.8  | 0.8   | 0.91 | 0.8          | 0.84 | 0.82  | 0.92 | 0.86     | 0.78 | 0.82  | 0.9  |
| miR-206 / miR-129-3p                                                  | 0.84     | 0.79 | 0.82  | 0.92 | 0.75         | 0.76 | 0.76  | 0.88 | 0.82     | 0.82 | 0.82  | 0.88 |
| miR-206 / miR-138                                                     | 0.8      | 0.72 | 0.76  | 0.89 | 0.8          | 0.84 | 0.82  | 0.9  | 0.8      | 0.78 | 0.79  | 0.87 |
| miR-206 / miR-874                                                     | 0.76     | 0.84 | 0.8   | 0.89 | 0.76         | 0.84 | 0.8   | 0.9  | 0.78     | 0.8  | 0.79  | 0.86 |
| miR-206 / miR-125b                                                    | 0.8      | 0.76 | 0.78  | 0.89 | 0.8          | 0.84 | 0.82  | 0.9  | 0.74     | 0.84 | 0.79  | 0.87 |
| miR-206 / miR-204                                                     | 0.64     | 0.76 | 0.7   | 0.84 | 0.84         | 0.84 | 0.84  | 0.88 | 0.78     | 0.78 | 0.78  | 0.85 |
| miR-206 / miR-29a                                                     | 0.68     | 0.76 | 0.72  | 0.86 | 0.72         | 0.76 | 0.74  | 0.86 | 0.78     | 0.76 | 0.77  | 0.85 |
| miR-206 / miR-155                                                     | 0.72     | 0.72 | 0.72  | 0.83 | 0.72         | 0.72 | 0.72  | 0.84 | 0.8      | 0.72 | 0.76  | 0.82 |
| miR-206 / miR-338-3p                                                  | 0.64     | 0.72 | 0.68  | 0.81 | 0.72         | 0.72 | 0.72  | 0.85 | 0.7      | 0.74 | 0.72  | 0.82 |
| miR-206 / miR-16                                                      | 0.76     | 0.76 | 0.76  | 0.87 | 0.72         | 0.8  | 0.76  | 0.92 | 0.94     | 0.76 | 0.85  | 0.89 |
| miR-206 / miR-451                                                     | 0.76     | 0.76 | 0.76  | 0.85 | 0.84         | 0.72 | 0.78  | 0.92 | 0.72     | 0.84 | 0.78  | 0.87 |
| miR-206 / miR-218                                                     | 0.8      | 0.8  | 0.8   | 0.85 | 0.76         | 0.8  | 0.78  | 0.84 | 0.8      | 0.8  | 0.8   | 0.83 |
| miR-206 / miR-7                                                       | 0.64     | 0.76 | 0.7   | 0.81 | 0.68         | 0.76 | 0.72  | 0.88 | 0.92     | 0.56 | 0.74  | 0.82 |
| miR-99b / miR-129-3p                                                  | 0.68     | 0.58 | 0.63  | 0.64 | 0.79         | 0.88 | 0.84  | 0.94 | 0.76     | 0.73 | 0.74  | 0.79 |
| miR-99b / miR-204                                                     | 0.44     | 0.56 | 0.5   | 0.6  | 0.88         | 0.84 | 0.86  | 0.97 | 0.82     | 0.7  | 0.76  | 0.8  |
| miR-99b / miR-9                                                       | 0.56     | 0.52 | 0.54  | 0.58 | 0.88         | 0.96 | 0.92  | 0.95 | 0.78     | 0.7  | 0.74  | 0.81 |
| miR-99b / miR-155                                                     | 0.52     | 0.6  | 0.56  | 0.6  | 0.8          | 0.8  | 0.8   | 0.96 | 0.64     | 0.84 | 0.74  | 0.8  |
| miR-99b / miR-338-3p                                                  | 0.64     | 0.52 | 0.58  | 0.6  | 0.84         | 0.84 | 0.84  | 0.96 | 0.74     | 0.76 | 0.75  | 0.81 |
| miR-99b / let-7e                                                      | 0.67     | 0.44 | 0.55  | 0.52 | 0.92         | 0.84 | 0.88  | 0.98 | 0.73     | 0.72 | 0.73  | 0.79 |
| miR-9* / miR-129-3p                                                   | 0.48     | 0.46 | 0.47  | 0.63 | 0.88         | 0.96 | 0.92  | 0.96 | 0.51     | 1    | 0.76  | 0.8  |
| miR-335-5p / miR-338-3p                                               | 0.72     | 0.72 | 0.72  | 0.81 | 0.72         | 0.8  | 0.76  | 0.84 | 0.62     | 0.74 | 0.68  | 0.78 |
| miR-206 / miR-129-3p & miR-335-5p / miR-338-3p                        | 0.68     | 1    | 0.84  | 0.93 | 0.84         | 0.88 | 0.86  | 0.95 | 0.78     | 0.78 | 0.78  | 0.92 |
| miR-206 / miR-31 & miR-335-5p / miR-338-3p                            | 0.64     | 1    | 0.82  | 0.93 | 0.84         | 0.92 | 0.88  | 0.96 | 0.84     | 0.92 | 0.88  | 0.96 |
| miR-206 / miR-874 & miR-335-5p / miR-338-3p                           | 0.64     | 1    | 0.82  | 0.91 | 0.76         | 0.96 | 0.86  | 0.95 | 0.78     | 0.96 | 0.87  | 0.94 |
| miR-206 / miR-16 & miR-335-5p / miR-338-3p                            | 0.76     | 0.88 | 0.82  | 0.9  | 0.76         | 0.96 | 0.86  | 0.95 | 0.72     | 0.88 | 0.8   | 0.91 |
| miR-206 / miR-204 & miR-206 / miR-218 & miR-335-5p / miR-338-3p       | 0.64     | 0.92 | 0.78  | 0.88 | 0.92         | 0.8  | 0.86  | 0.87 | 0.88     | 0.74 | 0.81  | 0.91 |
| miR-206 / miR-204 & miR-206 / miR-218 & miR-9* / miR-129-3p           | 0.8      | 0.8  | 0.8   | 0.85 | 0.84         | 0.96 | 0.9   | 0.98 | 0.88     | 0.82 | 0.85  | 0.91 |
| miR-206 / miR-338-3p & miR-99b / miR-129-3p & miR-335-5p / miR-338-3p | 0.68     | 0.84 | 0.76  | 0.88 | 0.96         | 0.92 | 0.94  | 0.98 | 0.84     | 0.8  | 0.82  | 0.92 |
| miR-206 / miR-338-3p & miR-99b / miR-155 & miR-335-5p / miR-338-3p    | 0.68     | 0.92 | 0.8   | 0.88 | 0.88         | 0.96 | 0.92  | 0.98 | 0.76     | 0.9  | 0.83  | 0.93 |
