# Supplementary material for: Circulating brain-enriched microRNAs as novel biomarkers for detection and differentiation of neurodegenerative diseases
Source: PubMed Central journal article supplement (PMC5679501; doi:10.1186/s13195-017-0316-0), 2017-11-09
Supplement: 13195_2017_316_MOESM6_ESM.pdf [file 13195_2017_316_MOESM6_ESM.pdf]

| Set                                                            | Training |      |       |      | Confirmation |      |       |      | Combined |      |       |      |
|----------------------------------------------------------------|----------|------|-------|------|--------------|------|-------|------|----------|------|-------|------|
|                                                                | SENS     | SPEC | ACCUR | AUC  | SENS         | SPEC | ACCUR | AUC  | SENS     | SPEC | ACCUR | AUC  |
| miR-125b / miR-29a                                             | 0.64     | 0.68 | 0.66  | 0.83 | 0.72         | 0.72 | 0.72  | 0.8  | 0.72     | 0.78 | 0.75  | 0.78 |
| miR-125b / miR-874                                             | 0.68     | 0.68 | 0.68  | 0.82 | 0.72         | 0.6  | 0.66  | 0.7  | 0.7      | 0.66 | 0.68  | 0.75 |
| miR-107 / miR-335-5p                                           | 0.72     | 0.68 | 0.7   | 0.72 | 0.8          | 0.8  | 0.8   | 0.91 | 0.7      | 0.74 | 0.72  | 0.8  |
| miR-155 / miR-29a                                              | 0.76     | 0.64 | 0.7   | 0.77 | 0.76         | 0.64 | 0.7   | 0.78 | 0.66     | 0.66 | 0.66  | 0.75 |
| miR-125b / miR-29a & miR-107 / miR-335-5p & miR-155 / miR-29a  | 0.76     | 0.84 | 0.8   | 0.87 | 0.88         | 0.88 | 0.88  | 0.94 | 0.78     | 0.74 | 0.76  | 0.87 |
| miR-125b / miR-29a & miR-125b / miR-874 & miR-107 / miR-335-5p | 0.64     | 0.68 | 0.66  | 0.85 | 0.84         | 0.84 | 0.84  | 0.92 | 0.78     | 0.76 | 0.77  | 0.87 |
| miR-125b / miR-874 & miR-107 / miR-335-5p & miR-155 / miR-29a  | 0.76     | 0.84 | 0.8   | 0.87 | 0.88         | 0.88 | 0.88  | 0.94 | 0.76     | 0.76 | 0.76  | 0.87 |

**Additional file 6. miRNA pairs and classifiers differentiating NDs from each other in training, confirmation, and combined sets. A: AD vs. FTD**

SENS: Sensitivity, SPEC: Specificity, ACCUR: Accuracy, AUC: Area under ROC curve.

| Set                                                                | Training |      |       |      | Confirmation |      |       |      | Combined |      |       |      |
|--------------------------------------------------------------------|----------|------|-------|------|--------------|------|-------|------|----------|------|-------|------|
|                                                                    | SENS     | SPEC | ACCUR | AUC  | SENS         | SPEC | ACCUR | AUC  | SENS     | SPEC | ACCUR | AUC  |
| miR-206 / miR-9*                                                   | 0.56     | 0.54 | 0.55  | 0.6  | 0.84         | 0.84 | 0.84  | 0.94 | 0.72     | 0.71 | 0.72  | 0.77 |
| miR-31 / miR-9*                                                    | 0.56     | 0.63 | 0.59  | 0.62 | 0.96         | 0.88 | 0.92  | 0.98 | 0.72     | 0.71 | 0.72  | 0.8  |
| miR-31 / miR-99b                                                   | 0.76     | 0.64 | 0.7   | 0.76 | 0.72         | 0.64 | 0.68  | 0.82 | 0.76     | 0.68 | 0.72  | 0.77 |
| miR-31 / miR-16                                                    | 0.72     | 0.8  | 0.76  | 0.82 | 0.72         | 0.72 | 0.72  | 0.76 | 0.68     | 0.76 | 0.72  | 0.77 |
| miR-31 / miR-29a                                                   | 0.68     | 0.6  | 0.64  | 0.79 | 0.8          | 0.72 | 0.76  | 0.85 | 0.8      | 0.66 | 0.73  | 0.81 |
| miR-138 / miR-9*                                                   | 0.44     | 0.5  | 0.47  | 0.54 | 1            | 1    | 1     | 1    | 0.7      | 0.65 | 0.68  | 0.76 |
| miR-138 / miR-99b                                                  | 0.64     | 0.56 | 0.6   | 0.7  | 0.84         | 0.8  | 0.82  | 0.93 | 0.74     | 0.68 | 0.71  | 0.82 |
| miR-138 / miR-181a                                                 | 0.76     | 0.72 | 0.74  | 0.84 | 0.72         | 0.68 | 0.7   | 0.81 | 0.64     | 0.72 | 0.68  | 0.78 |
| miR-138 / miR-491-5p                                               | 0.72     | 0.68 | 0.7   | 0.78 | 0.64         | 0.72 | 0.68  | 0.78 | 0.7      | 0.7  | 0.7   | 0.77 |
| miR-138 / miR-335-5p                                               | 0.68     | 0.68 | 0.68  | 0.76 | 0.64         | 0.68 | 0.66  | 0.83 | 0.64     | 0.74 | 0.69  | 0.79 |
| miR-138 / miR-128a                                                 | 0.68     | 0.72 | 0.7   | 0.81 | 0.64         | 0.56 | 0.6   | 0.8  | 0.7      | 0.7  | 0.7   | 0.78 |
| miR-138 / miR-146a                                                 | 0.6      | 0.68 | 0.64  | 0.71 | 0.8          | 0.72 | 0.76  | 0.83 | 0.6      | 0.74 | 0.67  | 0.77 |
| miR-138 / let-7e                                                   | 0.72     | 0.72 | 0.72  | 0.83 | 0.68         | 0.6  | 0.64  | 0.74 | 0.66     | 0.7  | 0.68  | 0.77 |
| miR-138 / miR-16                                                   | 0.64     | 0.68 | 0.66  | 0.72 | 0.8          | 0.68 | 0.74  | 0.87 | 0.72     | 0.62 | 0.67  | 0.77 |
| miR-138 / miR-29a                                                  | 0.52     | 0.48 | 0.5   | 0.61 | 0.8          | 0.8  | 0.8   | 0.91 | 0.72     | 0.66 | 0.69  | 0.76 |
| miR-129-3p / miR-9*                                                | 0.68     | 0.58 | 0.63  | 0.75 | 1            | 0.92 | 0.96  | 0.99 | 0.7      | 0.73 | 0.72  | 0.85 |
| miR-129-3p / miR-99b                                               | 0.8      | 0.58 | 0.69  | 0.83 | 0.8          | 0.68 | 0.74  | 0.86 | 0.76     | 0.76 | 0.76  | 0.83 |
| miR-129-3p / miR-335-5p                                            | 0.72     | 0.83 | 0.78  | 0.88 | 0.6          | 0.6  | 0.6   | 0.7  | 0.68     | 0.63 | 0.66  | 0.78 |
| miR-129-3p / miR-146a                                              | 0.76     | 0.67 | 0.71  | 0.85 | 0.6          | 0.68 | 0.64  | 0.7  | 0.72     | 0.55 | 0.64  | 0.77 |
| miR-129-3p / miR-16                                                | 0.8      | 0.79 | 0.8   | 0.85 | 0.68         | 0.56 | 0.62  | 0.72 | 0.74     | 0.67 | 0.71  | 0.78 |
| miR-129-3p / miR-29a                                               | 0.64     | 0.67 | 0.65  | 0.8  | 0.64         | 0.6  | 0.62  | 0.77 | 0.62     | 0.65 | 0.64  | 0.76 |
| miR-125b / miR-9*                                                  | 0.48     | 0.63 | 0.55  | 0.62 | 0.96         | 0.96 | 0.96  | 0.98 | 0.74     | 0.61 | 0.68  | 0.75 |
| miR-125b / miR-99b                                                 | 0.64     | 0.6  | 0.62  | 0.75 | 0.76         | 0.76 | 0.76  | 0.88 | 0.78     | 0.66 | 0.72  | 0.81 |
| miR-125b / miR-181a                                                | 0.76     | 0.84 | 0.8   | 0.93 | 0.68         | 0.64 | 0.66  | 0.73 | 0.66     | 0.76 | 0.71  | 0.78 |
| miR-125b / miR-491-5p                                              | 0.84     | 0.84 | 0.84  | 0.9  | 0.56         | 0.76 | 0.66  | 0.71 | 0.7      | 0.8  | 0.75  | 0.79 |
| miR-125b / miR-335-5p                                              | 0.76     | 0.76 | 0.76  | 0.86 | 0.68         | 0.72 | 0.7   | 0.77 | 0.68     | 0.72 | 0.7   | 0.8  |
| miR-125b / miR-128a                                                | 0.8      | 0.8  | 0.8   | 0.92 | 0.6          | 0.8  | 0.7   | 0.74 | 0.7      | 0.78 | 0.74  | 0.8  |
| miR-125b / miR-146a                                                | 0.6      | 0.76 | 0.68  | 0.84 | 0.56         | 0.76 | 0.66  | 0.8  | 0.7      | 0.68 | 0.69  | 0.78 |
| miR-125b / let-7e                                                  | 0.84     | 0.88 | 0.86  | 0.95 | 0.52         | 0.72 | 0.62  | 0.65 | 0.74     | 0.78 | 0.76  | 0.79 |
| miR-218 / miR-9*                                                   | 0.56     | 0.63 | 0.59  | 0.61 | 0.84         | 0.88 | 0.86  | 0.96 | 0.62     | 0.73 | 0.68  | 0.77 |
| miR-218 / miR-16                                                   | 0.64     | 0.71 | 0.67  | 0.77 | 0.68         | 0.72 | 0.7   | 0.79 | 0.7      | 0.71 | 0.71  | 0.76 |
| miR-204 / miR-9*                                                   | 0.56     | 0.58 | 0.57  | 0.66 | 0.84         | 1    | 0.92  | 1    | 0.72     | 0.76 | 0.74  | 0.82 |
| miR-204 / miR-99b                                                  | 0.72     | 0.72 | 0.72  | 0.79 | 0.84         | 0.68 | 0.76  | 0.89 | 0.68     | 0.66 | 0.67  | 0.8  |
| miR-204 / miR-146a                                                 | 0.76     | 0.68 | 0.72  | 0.86 | 0.6          | 0.72 | 0.66  | 0.76 | 0.76     | 0.64 | 0.7   | 0.78 |
| miR-338-3p / miR-99b                                               | 0.52     | 0.6  | 0.56  | 0.64 | 0.76         | 0.8  | 0.78  | 0.88 | 0.66     | 0.66 | 0.66  | 0.75 |
| miR-107 / miR-99b                                                  | 0.36     | 0.64 | 0.5   | 0.53 | 0.92         | 0.92 | 0.92  | 0.99 | 0.66     | 0.72 | 0.69  | 0.78 |
| miR-107 / miR-491-5p                                               | 0.72     | 0.56 | 0.64  | 0.76 | 0.72         | 0.6  | 0.66  | 0.79 | 0.72     | 0.56 | 0.64  | 0.76 |
| miR-31 / miR-16 &<br>miR-129-3p / miR-9* &<br>miR-204 / miR-99b    | 0.8      | 0.92 | 0.86  | 0.91 | 0.96         | 0.8  | 0.88  | 0.98 | 0.88     | 0.88 | 0.88  | 0.95 |
| miR-129-3p / miR-16 &<br>miR-125b / miR-181a &<br>miR-204 / miR-9* | 0.8      | 0.84 | 0.82  | 0.95 | 0.8          | 0.88 | 0.84  | 0.96 | 0.84     | 0.86 | 0.85  | 0.95 |
| miR-31 / miR-99b &<br>miR-129-3p / miR-16 &<br>miR-204 / miR-9*    | 0.8      | 0.76 | 0.78  | 0.93 | 0.92         | 0.8  | 0.86  | 0.98 | 0.9      | 0.88 | 0.89  | 0.96 |
| miR-31 / miR-16 &<br>miR-125b / miR-181a &<br>miR-204 / miR-9*     | 0.8      | 0.84 | 0.82  | 0.94 | 0.84         | 0.84 | 0.84  | 0.96 | 0.82     | 0.88 | 0.85  | 0.95 |
| miR-31 / miR-16 &<br>miR-129-3p / miR-335-5p &<br>miR-204 / miR-9* | 0.88     | 0.88 | 0.88  | 0.94 | 0.84         | 0.84 | 0.84  | 0.96 | 0.86     | 0.9  | 0.88  | 0.96 |

Additional file 6. B: AD vs. PD

| Set                                                                 | Training |      |       |      | Confirmation |      |       |      | Combined |      |       |      |
|---------------------------------------------------------------------|----------|------|-------|------|--------------|------|-------|------|----------|------|-------|------|
|                                                                     | SENS     | SPEC | ACCUR | AUC  | SENS         | SPEC | ACCUR | AUC  | SENS     | SPEC | ACCUR | AUC  |
| miR-329 / miR-206                                                   | 0.8      | 0.8  | 0.8   | 0.89 | 0.72         | 0.68 | 0.7   | 0.77 | 0.76     | 0.76 | 0.76  | 0.82 |
| miR-329 / miR-9*                                                    | 0.68     | 0.64 | 0.66  | 0.73 | 0.8          | 0.72 | 0.76  | 0.83 | 0.68     | 0.58 | 0.63  | 0.77 |
| miR-329 / miR-99b                                                   | 0.68     | 0.72 | 0.7   | 0.75 | 0.76         | 0.68 | 0.72  | 0.86 | 0.72     | 0.7  | 0.71  | 0.78 |
| miR-329 / miR-335-5p                                                | 0.84     | 0.72 | 0.78  | 0.89 | 0.68         | 0.6  | 0.64  | 0.7  | 0.74     | 0.66 | 0.7   | 0.79 |
| miR-329 / miR-146a                                                  | 0.8      | 0.76 | 0.78  | 0.87 | 0.6          | 0.56 | 0.58  | 0.67 | 0.74     | 0.64 | 0.69  | 0.77 |
| miR-329 / miR-411                                                   | 0.76     | 0.72 | 0.74  | 0.84 | 0.68         | 0.56 | 0.62  | 0.67 | 0.74     | 0.64 | 0.69  | 0.76 |
| miR-31 / miR-206                                                    | 0.84     | 0.76 | 0.8   | 0.87 | 0.88         | 0.8  | 0.84  | 0.91 | 0.78     | 0.78 | 0.78  | 0.88 |
| miR-31 / miR-16                                                     | 0.64     | 0.6  | 0.62  | 0.71 | 0.8          | 0.68 | 0.74  | 0.87 | 0.7      | 0.7  | 0.7   | 0.78 |
| miR-129-3p / miR-206                                                | 0.88     | 0.84 | 0.86  | 0.92 | 0.72         | 0.79 | 0.76  | 0.85 | 0.8      | 0.82 | 0.81  | 0.87 |
| miR-129-3p / miR-16                                                 | 0.72     | 0.64 | 0.68  | 0.8  | 0.68         | 0.67 | 0.67  | 0.75 | 0.74     | 0.61 | 0.68  | 0.76 |
| miR-433 / miR-206                                                   | 0.8      | 0.76 | 0.78  | 0.85 | 0.56         | 0.76 | 0.66  | 0.8  | 0.7      | 0.74 | 0.72  | 0.8  |
| miR-433 / miR-335-5p                                                | 0.76     | 0.56 | 0.66  | 0.79 | 0.72         | 0.72 | 0.72  | 0.76 | 0.76     | 0.6  | 0.68  | 0.76 |
| miR-125b / miR-206                                                  | 0.8      | 0.8  | 0.8   | 0.91 | 0.8          | 0.8  | 0.8   | 0.88 | 0.76     | 0.78 | 0.77  | 0.87 |
| miR-125b / miR-335-5p                                               | 0.64     | 0.68 | 0.66  | 0.8  | 0.68         | 0.76 | 0.72  | 0.78 | 0.62     | 0.72 | 0.67  | 0.78 |
| miR-125b / miR-874                                                  | 0.72     | 0.8  | 0.76  | 0.9  | 0.68         | 0.52 | 0.6   | 0.64 | 0.7      | 0.7  | 0.7   | 0.75 |
| miR-323-3p / miR-206                                                | 0.8      | 0.8  | 0.8   | 0.85 | 0.68         | 0.72 | 0.7   | 0.78 | 0.7      | 0.72 | 0.71  | 0.8  |
| miR-495 / miR-206                                                   | 0.76     | 0.76 | 0.76  | 0.84 | 0.68         | 0.72 | 0.7   | 0.78 | 0.72     | 0.76 | 0.74  | 0.79 |
| miR-382 / miR-206                                                   | 0.72     | 0.68 | 0.7   | 0.82 | 0.64         | 0.68 | 0.66  | 0.77 | 0.68     | 0.72 | 0.7   | 0.77 |
| miR-204 / miR-206                                                   | 0.6      | 0.76 | 0.68  | 0.85 | 0.72         | 0.76 | 0.74  | 0.82 | 0.76     | 0.74 | 0.75  | 0.82 |
| miR-127-3p / miR-206                                                | 0.8      | 0.72 | 0.76  | 0.81 | 0.64         | 0.72 | 0.68  | 0.78 | 0.7      | 0.72 | 0.71  | 0.78 |
| miR-107 / miR-206                                                   | 0.76     | 0.76 | 0.76  | 0.86 | 0.68         | 0.68 | 0.68  | 0.75 | 0.74     | 0.68 | 0.71  | 0.79 |
| miR-107 / miR-99b                                                   | 0.4      | 0.72 | 0.56  | 0.59 | 0.8          | 0.84 | 0.82  | 0.88 | 0.68     | 0.74 | 0.71  | 0.77 |
| miR-107 / miR-335-5p                                                | 0.72     | 0.8  | 0.76  | 0.9  | 0.68         | 0.64 | 0.66  | 0.77 | 0.74     | 0.62 | 0.68  | 0.82 |
| miR-107 / let-7e                                                    | 0.96     | 0.83 | 0.9   | 0.98 | 0.36         | 0.52 | 0.44  | 0.48 | 0.7      | 0.61 | 0.66  | 0.79 |
| miR-107 / miR-146a                                                  | 0.72     | 0.72 | 0.72  | 0.85 | 0.68         | 0.68 | 0.68  | 0.81 | 0.76     | 0.78 | 0.77  | 0.83 |
| miR-107 / miR-491-5p                                                | 0.88     | 0.8  | 0.84  | 0.88 | 0.68         | 0.68 | 0.68  | 0.75 | 0.74     | 0.7  | 0.72  | 0.8  |
| miR-138 / miR-206                                                   | 0.72     | 0.76 | 0.74  | 0.84 | 0.8          | 0.8  | 0.8   | 0.89 | 0.76     | 0.7  | 0.73  | 0.84 |
| miR-411 / miR-206                                                   | 0.76     | 0.72 | 0.74  | 0.83 | 0.6          | 0.72 | 0.66  | 0.75 | 0.66     | 0.74 | 0.7   | 0.77 |
| miR-134 / miR-206                                                   | 0.76     | 0.68 | 0.72  | 0.8  | 0.64         | 0.64 | 0.64  | 0.76 | 0.66     | 0.72 | 0.69  | 0.76 |
| miR-9 / miR-206                                                     | 0.72     | 0.76 | 0.74  | 0.82 | 0.64         | 0.68 | 0.66  | 0.75 | 0.72     | 0.7  | 0.71  | 0.76 |
| miR-155 / miR-206                                                   | 0.68     | 0.76 | 0.72  | 0.83 | 0.76         | 0.72 | 0.74  | 0.8  | 0.74     | 0.72 | 0.73  | 0.8  |
| miR-7 / miR-206                                                     | 0.72     | 0.64 | 0.68  | 0.85 | 0.64         | 0.68 | 0.66  | 0.84 | 0.7      | 0.7  | 0.7   | 0.81 |
| miR-338-3p / miR-206                                                | 0.76     | 0.8  | 0.78  | 0.86 | 0.64         | 0.68 | 0.66  | 0.77 | 0.76     | 0.66 | 0.71  | 0.8  |
| miR-29a / miR-206                                                   | 0.88     | 0.8  | 0.84  | 0.9  | 0.68         | 0.72 | 0.7   | 0.77 | 0.76     | 0.78 | 0.77  | 0.82 |
| miR-31 / miR-206 & miR-125b / miR-335-5p                            | 0.96     | 0.8  | 0.88  | 0.95 | 0.84         | 0.88 | 0.86  | 0.96 | 0.86     | 0.8  | 0.83  | 0.93 |
| miR-31 / miR-206 & miR-125b / miR-335-5p & miR-107 / miR-335-5p     | 1        | 0.92 | 0.96  | 0.99 | 0.88         | 0.96 | 0.92  | 0.97 | 0.94     | 0.92 | 0.93  | 0.98 |
| miR-31 / miR-206 & miR-125b / miR-335-5p & miR-107 / miR-491-5p     | 0.92     | 0.88 | 0.9   | 0.99 | 0.92         | 0.96 | 0.94  | 0.98 | 0.92     | 0.94 | 0.93  | 0.98 |
| miR-125b / miR-335-5p & miR-107 / let-7e & miR-138 / miR-206        | 1        | 0.96 | 0.98  | 1    | 0.84         | 0.8  | 0.82  | 0.94 | 0.9      | 0.9  | 0.9   | 0.98 |
| miR-125b / miR-335-5p & miR-107 / miR-491-5p & miR-338-3p / miR-206 | 0.88     | 1    | 0.94  | 1    | 0.84         | 0.92 | 0.88  | 0.96 | 0.92     | 0.94 | 0.93  | 0.98 |
| miR-125b / miR-335-5p & miR-107 / let-7e & miR-338-3p / miR-206     | 1        | 1    | 1     | 1    | 0.8          | 0.88 | 0.84  | 0.87 | 0.94     | 0.9  | 0.92  | 0.98 |
| miR-125b / miR-335-5p & miR-323-3p / miR-206 & miR-107 / let-7e     | 1        | 0.96 | 0.98  | 1    | 0.8          | 0.88 | 0.84  | 0.89 | 0.94     | 0.88 | 0.91  | 0.98 |

Additional file 6. C: AD vs. ALS

| Set                                                                           | Training |      |       |      | Confirmation |      |       |      | Combined |      |       |      |
|-------------------------------------------------------------------------------|----------|------|-------|------|--------------|------|-------|------|----------|------|-------|------|
|                                                                               | SENS     | SPEC | ACCUR | AUC  | SENS         | SPEC | ACCUR | AUC  | SENS     | SPEC | ACCUR | AUC  |
| miR-218 / miR-9*                                                              | 0.64     | 0.63 | 0.63  | 0.71 | 0.84         | 0.76 | 0.8   | 0.92 | 0.66     | 0.69 | 0.68  | 0.78 |
| miR-218 / miR-99b                                                             | 0.76     | 0.67 | 0.71  | 0.8  | 0.6          | 0.68 | 0.64  | 0.74 | 0.68     | 0.67 | 0.68  | 0.76 |
| miR-138 / miR-99b                                                             | 0.68     | 0.64 | 0.66  | 0.77 | 0.68         | 0.68 | 0.68  | 0.87 | 0.72     | 0.68 | 0.7   | 0.79 |
| miR-138 / miR-181a                                                            | 0.68     | 0.68 | 0.68  | 0.82 | 0.56         | 0.68 | 0.62  | 0.73 | 0.62     | 0.72 | 0.67  | 0.77 |
| miR-138 / miR-491-5p                                                          | 0.72     | 0.72 | 0.72  | 0.84 | 0.6          | 0.68 | 0.64  | 0.69 | 0.68     | 0.7  | 0.69  | 0.75 |
| miR-31 / miR-9*                                                               | 0.64     | 0.54 | 0.59  | 0.67 | 0.8          | 0.8  | 0.8   | 0.94 | 0.7      | 0.59 | 0.65  | 0.76 |
| miR-31 / miR-99b                                                              | 0.72     | 0.64 | 0.68  | 0.79 | 0.68         | 0.56 | 0.62  | 0.78 | 0.68     | 0.6  | 0.64  | 0.77 |
| miR-129-3p / miR-9*                                                           | 0.52     | 0.54 | 0.53  | 0.59 | 0.88         | 0.92 | 0.9   | 0.95 | 0.68     | 0.67 | 0.68  | 0.8  |
| miR-129-3p / miR-99b                                                          | 0.72     | 0.58 | 0.65  | 0.8  | 0.8          | 0.64 | 0.72  | 0.84 | 0.72     | 0.73 | 0.73  | 0.8  |
| miR-204 / miR-9*                                                              | 0.52     | 0.54 | 0.53  | 0.62 | 0.8          | 0.96 | 0.88  | 0.94 | 0.76     | 0.71 | 0.74  | 0.77 |
| miR-204 / miR-99b                                                             | 0.68     | 0.72 | 0.7   | 0.83 | 0.68         | 0.6  | 0.64  | 0.83 | 0.68     | 0.66 | 0.67  | 0.81 |
| miR-338-3p / miR-99b                                                          | 0.68     | 0.68 | 0.68  | 0.8  | 0.84         | 0.88 | 0.86  | 0.94 | 0.74     | 0.78 | 0.76  | 0.86 |
| miR-338-3p / miR-491-5p                                                       | 0.84     | 0.8  | 0.82  | 0.92 | 0.6          | 0.68 | 0.64  | 0.77 | 0.7      | 0.76 | 0.73  | 0.84 |
| miR-338-3p / miR-107                                                          | 0.72     | 0.8  | 0.76  | 0.88 | 0.6          | 0.72 | 0.66  | 0.7  | 0.68     | 0.74 | 0.71  | 0.78 |
| miR-338-3p / let-7e                                                           | 0.76     | 0.8  | 0.78  | 0.88 | 0.52         | 0.56 | 0.54  | 0.62 | 0.58     | 0.68 | 0.63  | 0.76 |
| miR-338-3p / miR-146a                                                         | 0.68     | 0.76 | 0.72  | 0.84 | 0.76         | 0.68 | 0.72  | 0.79 | 0.66     | 0.72 | 0.69  | 0.79 |
| miR-874 / miR-99b                                                             | 0.68     | 0.72 | 0.7   | 0.77 | 0.72         | 0.6  | 0.66  | 0.8  | 0.7      | 0.64 | 0.67  | 0.77 |
| miR-125b / miR-99b                                                            | 0.6      | 0.6  | 0.6   | 0.73 | 0.72         | 0.76 | 0.74  | 0.83 | 0.68     | 0.62 | 0.65  | 0.77 |
| miR-29a / miR-99b                                                             | 0.76     | 0.72 | 0.74  | 0.81 | 0.76         | 0.72 | 0.74  | 0.83 | 0.72     | 0.76 | 0.74  | 0.79 |
| miR-323-3p / miR-127-3p                                                       | 0.76     | 0.76 | 0.76  | 0.87 | 0.68         | 0.56 | 0.62  | 0.68 | 0.68     | 0.74 | 0.71  | 0.78 |
| miR-411 / miR-127-3p                                                          | 0.76     | 0.76 | 0.76  | 0.85 | 0.64         | 0.64 | 0.64  | 0.76 | 0.6      | 0.76 | 0.68  | 0.8  |
| miR-155 / miR-99b                                                             | 0.72     | 0.56 | 0.64  | 0.66 | 0.8          | 0.76 | 0.78  | 0.88 | 0.76     | 0.66 | 0.71  | 0.76 |
| miR-335-5p / miR-99b                                                          | 0.4      | 0.56 | 0.48  | 0.53 | 0.8          | 1    | 0.9   | 0.96 | 0.64     | 0.7  | 0.67  | 0.76 |
| miR-129-3p / miR-9* &<br>miR-338-3p / miR-99b &<br>miR-323-3p / miR-127-3p    | 0.6      | 0.8  | 0.7   | 0.88 | 0.84         | 1    | 0.92  | 0.97 | 0.84     | 0.9  | 0.87  | 0.93 |
| miR-129-3p / miR-9* &<br>miR-338-3p / miR-491-5p &<br>miR-411 / miR-127-3p    | 0.76     | 0.8  | 0.78  | 0.9  | 0.84         | 0.88 | 0.86  | 0.94 | 0.78     | 0.9  | 0.84  | 0.93 |
| miR-129-3p / miR-9* &<br>miR-338-3p / miR-491-5p &<br>miR-323-3p / miR-127-3p | 0.72     | 0.76 | 0.74  | 0.91 | 0.76         | 0.84 | 0.8   | 0.91 | 0.76     | 0.88 | 0.82  | 0.93 |
| miR-204 / miR-9* &<br>miR-338-3p / miR-491-5p &<br>miR-323-3p / miR-127-3p    | 0.8      | 0.8  | 0.8   | 0.9  | 0.8          | 0.88 | 0.84  | 0.93 | 0.74     | 0.88 | 0.81  | 0.92 |
| miR-129-3p / miR-9* &<br>miR-29a / miR-99b &<br>miR-323-3p / miR-127-3p       | 0.68     | 0.8  | 0.74  | 0.88 | 0.8          | 0.92 | 0.86  | 0.93 | 0.74     | 0.84 | 0.79  | 0.93 |
| miR-138 / miR-181a &<br>miR-129-3p / miR-9* &<br>miR-411 / miR-127-3p         | 0.6      | 0.84 | 0.72  | 0.86 | 0.8          | 0.92 | 0.86  | 0.93 | 0.74     | 0.94 | 0.84  | 0.92 |

Additional file 6. D: FTD vs. PD

| Set                                                             | Training |      |       |      | Confirmation |      |       |      | Combined |      |       |      |
|-----------------------------------------------------------------|----------|------|-------|------|--------------|------|-------|------|----------|------|-------|------|
|                                                                 | SENS     | SPEC | ACCUR | AUC  | SENS         | SPEC | ACCUR | AUC  | SENS     | SPEC | ACCUR | AUC  |
| miR-31 / miR-206                                                | 0.8      | 0.76 | 0.78  | 0.87 | 0.76         | 0.84 | 0.8   | 0.92 | 0.8      | 0.76 | 0.78  | 0.87 |
| miR-138 / miR-206                                               | 0.76     | 0.92 | 0.84  | 0.89 | 0.84         | 0.76 | 0.8   | 0.87 | 0.78     | 0.7  | 0.74  | 0.85 |
| miR-29a / miR-206                                               | 0.84     | 0.8  | 0.82  | 0.9  | 0.76         | 0.72 | 0.74  | 0.87 | 0.78     | 0.78 | 0.78  | 0.87 |
| miR-129-3p / miR-206                                            | 0.76     | 0.68 | 0.72  | 0.85 | 0.8          | 0.83 | 0.82  | 0.91 | 0.8      | 0.8  | 0.8   | 0.86 |
| miR-204 / miR-206                                               | 0.76     | 0.76 | 0.76  | 0.84 | 0.76         | 0.84 | 0.8   | 0.89 | 0.74     | 0.74 | 0.74  | 0.85 |
| miR-338-3p / miR-206                                            | 0.72     | 0.76 | 0.74  | 0.87 | 0.72         | 0.72 | 0.72  | 0.83 | 0.74     | 0.72 | 0.73  | 0.84 |
| miR-338-3p / let-7e                                             | 0.96     | 0.83 | 0.9   | 0.99 | 0.44         | 0.56 | 0.5   | 0.55 | 0.58     | 0.76 | 0.67  | 0.81 |
| miR-7 / miR-206                                                 | 0.88     | 0.88 | 0.88  | 0.95 | 0.64         | 0.68 | 0.66  | 0.84 | 0.76     | 0.68 | 0.72  | 0.85 |
| miR-128a / miR-206                                              | 0.72     | 0.76 | 0.74  | 0.85 | 0.72         | 0.72 | 0.72  | 0.83 | 0.76     | 0.72 | 0.74  | 0.82 |
| miR-16 / miR-206                                                | 0.8      | 0.8  | 0.8   | 0.94 | 0.76         | 0.68 | 0.72  | 0.86 | 0.76     | 0.76 | 0.76  | 0.88 |
| miR-125b / miR-206                                              | 0.72     | 0.8  | 0.76  | 0.86 | 0.76         | 0.76 | 0.76  | 0.89 | 0.78     | 0.74 | 0.76  | 0.85 |
| miR-874 / miR-206                                               | 0.8      | 0.72 | 0.76  | 0.85 | 0.8          | 0.76 | 0.78  | 0.88 | 0.72     | 0.78 | 0.75  | 0.84 |
| miR-218 / miR-206                                               | 0.8      | 0.84 | 0.82  | 0.88 | 0.8          | 0.68 | 0.74  | 0.82 | 0.76     | 0.8  | 0.78  | 0.83 |
| miR-29a / miR-206 & miR-338-3p / let-7e                         | 0.96     | 0.92 | 0.94  | 1    | 0.64         | 0.76 | 0.7   | 0.78 | 0.8      | 0.84 | 0.82  | 0.93 |
| miR-129-3p / miR-206 & miR-338-3p / let-7e                      | 0.92     | 0.88 | 0.9   | 0.99 | 0.68         | 0.72 | 0.7   | 0.8  | 0.84     | 0.86 | 0.85  | 0.94 |
| miR-204 / miR-206 & miR-338-3p / let-7e                         | 0.92     | 0.96 | 0.94  | 0.99 | 0.6          | 0.72 | 0.66  | 0.81 | 0.8      | 0.88 | 0.84  | 0.94 |
| miR-138 / miR-206 & miR-338-3p / let-7e                         | 0.92     | 0.96 | 0.94  | 1    | 0.6          | 0.8  | 0.7   | 0.78 | 0.78     | 0.9  | 0.84  | 0.93 |
| miR-129-3p / miR-206 & miR-338-3p / let-7e & miR-125b / miR-206 | 0.88     | 0.84 | 0.86  | 0.96 | 0.6          | 0.8  | 0.7   | 0.89 | 0.84     | 0.82 | 0.83  | 0.93 |
| miR-129-3p / miR-206 & miR-338-3p / let-7e & miR-874 / miR-206  | 0.88     | 0.8  | 0.84  | 0.96 | 0.64         | 0.8  | 0.72  | 0.87 | 0.84     | 0.82 | 0.83  | 0.93 |
| miR-129-3p / miR-206 & miR-338-3p / let-7e & miR-7 / miR-206    | 0.92     | 0.84 | 0.88  | 0.99 | 0.68         | 0.8  | 0.74  | 0.84 | 0.8      | 0.82 | 0.81  | 0.93 |

Additional file 6. E: FTD vs. ALS

| Set                                                    | Training |      |       |      | Confirmation |      |       |      | Combined |      |       |      |
|--------------------------------------------------------|----------|------|-------|------|--------------|------|-------|------|----------|------|-------|------|
|                                                        | SENS     | SPEC | ACCUR | AUC  | SENS         | SPEC | ACCUR | AUC  | SENS     | SPEC | ACCUR | AUC  |
| miR-329 / miR-206                                      | 0.68     | 0.72 | 0.7   | 0.83 | 0.72         | 0.76 | 0.74  | 0.87 | 0.78     | 0.76 | 0.77  | 0.84 |
| miR-9* / miR-206                                       | 0.72     | 0.67 | 0.69  | 0.89 | 0.84         | 0.84 | 0.84  | 0.92 | 0.78     | 0.78 | 0.78  | 0.87 |
| miR-433 / miR-206                                      | 0.72     | 0.8  | 0.76  | 0.84 | 0.76         | 0.68 | 0.72  | 0.88 | 0.74     | 0.76 | 0.75  | 0.85 |
| miR-370 / miR-206                                      | 0.72     | 0.72 | 0.72  | 0.84 | 0.76         | 0.72 | 0.74  | 0.84 | 0.68     | 0.72 | 0.7   | 0.81 |
| miR-134 / miR-206                                      | 0.68     | 0.76 | 0.72  | 0.84 | 0.76         | 0.72 | 0.74  | 0.87 | 0.72     | 0.74 | 0.73  | 0.84 |
| miR-323-3p / miR-206                                   | 0.68     | 0.76 | 0.72  | 0.84 | 0.76         | 0.68 | 0.72  | 0.87 | 0.76     | 0.76 | 0.76  | 0.85 |
| miR-9 / miR-206                                        | 0.76     | 0.72 | 0.74  | 0.87 | 0.76         | 0.72 | 0.74  | 0.86 | 0.7      | 0.78 | 0.74  | 0.85 |
| miR-99b / miR-206                                      | 0.8      | 0.76 | 0.78  | 0.9  | 0.72         | 0.76 | 0.74  | 0.84 | 0.74     | 0.8  | 0.77  | 0.86 |
| miR-495 / miR-206                                      | 0.72     | 0.72 | 0.72  | 0.82 | 0.76         | 0.72 | 0.74  | 0.87 | 0.76     | 0.76 | 0.76  | 0.84 |
| miR-382 / miR-206                                      | 0.68     | 0.76 | 0.72  | 0.85 | 0.76         | 0.68 | 0.72  | 0.85 | 0.72     | 0.72 | 0.72  | 0.84 |
| miR-491-5p / miR-206                                   | 0.92     | 0.64 | 0.78  | 0.92 | 0.76         | 0.72 | 0.74  | 0.87 | 0.76     | 0.76 | 0.76  | 0.87 |
| miR-29a / miR-206                                      | 0.72     | 0.8  | 0.76  | 0.9  | 0.8          | 0.72 | 0.76  | 0.9  | 0.76     | 0.78 | 0.77  | 0.89 |
| miR-411 / miR-206                                      | 0.72     | 0.72 | 0.72  | 0.84 | 0.76         | 0.68 | 0.72  | 0.86 | 0.7      | 0.74 | 0.72  | 0.84 |
| miR-181a / miR-206                                     | 0.76     | 0.68 | 0.72  | 0.88 | 0.72         | 0.68 | 0.7   | 0.86 | 0.76     | 0.72 | 0.74  | 0.84 |
| miR-155 / miR-206                                      | 0.8      | 0.76 | 0.78  | 0.89 | 0.72         | 0.76 | 0.74  | 0.87 | 0.8      | 0.74 | 0.77  | 0.87 |
| miR-146a / miR-206                                     | 0.64     | 0.76 | 0.7   | 0.88 | 0.76         | 0.76 | 0.76  | 0.86 | 0.76     | 0.68 | 0.72  | 0.86 |
| miR-7 / miR-206                                        | 0.72     | 0.88 | 0.8   | 0.92 | 0.88         | 0.72 | 0.8   | 0.89 | 0.8      | 0.76 | 0.78  | 0.89 |
| miR-29a / miR-206 & miR-7 / miR-206                    | 0.88     | 0.76 | 0.82  | 0.92 | 0.72         | 0.76 | 0.74  | 0.9  | 0.78     | 0.76 | 0.77  | 0.9  |
| miR-9* / miR-206 & miR-7 / miR-206                     | 0.8      | 0.76 | 0.78  | 0.91 | 0.8          | 0.84 | 0.82  | 0.92 | 0.78     | 0.8  | 0.79  | 0.91 |
| miR-9* / miR-206 & miR-155 / miR-206 & miR-7 / miR-206 | 0.8      | 0.8  | 0.8   | 0.9  | 0.84         | 0.8  | 0.82  | 0.91 | 0.82     | 0.8  | 0.81  | 0.9  |

Additional file 6. F: PD vs. ALS
