# Supplementary material for: Circulating brain-enriched microRNAs as novel biomarkers for detection and differentiation of neurodegenerative diseases
Source: PubMed Central journal article supplement (PMC5679501; doi:10.1186/s13195-017-0316-0), 2017-11-09
Supplement: 13195_2017_316_MOESM8_ESM.pdf [file 13195_2017_316_MOESM8_ESM.pdf]

A. Differentiation of FTD syndromes from other FTD patients. bv – behavioral variant (23 participants); PPA – primary progressive aphasia; (17 participants) PSP – progressive supranuclear palsy (10 participants).

| Subgroup (N) |                                                                  | SENS | SPEC | ACCUR | AUC  |
|--------------|------------------------------------------------------------------|------|------|-------|------|
| FTD_bv (23)  | miR-335-5p / miR-433                                             | 0.59 | 0.74 | 0.66  | 0.71 |
|              | miR-335-5p / miR-370                                             | 0.48 | 0.74 | 0.6   | 0.72 |
|              | miR-29a / miR-204                                                | 0.7  | 0.61 | 0.66  | 0.71 |
|              | let-7e / miR-370                                                 | 0.33 | 0.74 | 0.52  | 0.74 |
|              | miR-335-5p / miR-433 + miR-335-5p / miR-370 + miR-29a / miR-204  | 0.44 | 0.78 | 0.6   | 0.77 |
| FTD_PPA (17) | miR-370 / miR-29a                                                | 0.7  | 0.47 | 0.62  | 0.7  |
|              | miR-134 / miR-29a                                                | 0.67 | 0.53 | 0.62  | 0.72 |
|              | miR-181a / miR-138                                               | 0.61 | 0.59 | 0.6   | 0.71 |
|              | miR-338-3p / miR-29a                                             | 0.58 | 0.65 | 0.6   | 0.7  |
|              | miR-134 / miR-29a + miR-181a / miR-138 + miR-338-3p / miR-29a    | 0.73 | 0.71 | 0.72  | 0.76 |
| FTD_PSP (10) | miR-204 / miR-9                                                  | 0.65 | 0.4  | 0.6   | 0.74 |
|              | miR-323-3p / miR-134                                             | 0.7  | 0.5  | 0.66  | 0.74 |
|              | miR-155 / miR-99b                                                | 0.75 | 0.7  | 0.74  | 0.74 |
|              | miR-338-3p / miR-181a                                            | 0.75 | 0.7  | 0.74  | 0.77 |
|              | miR-338-3p / miR-9 + miR-323-3p / miR-411 + miR-323-3p / miR-370 | 0.8  | 0.5  | 0.74  | 0.87 |

**Additional file 8. Differentiation of ND subgroups from other research participants with the same ND**

The data is given for the combined groups (total 50 participants for each ND). For example, the data for FTD\_PPA presents miRNA pairs and classifiers differentiating FTD patients with primary progressive aphasia (17 participants) from all other FTD patients (33 participants). SENS: Sensitivity, SPEC: Specificity, ACCUR: Accuracy, AUC: Area under ROC curve.

B. Differentiation of PD with dementia (12 participants) from other PD patients.

| Subgroup (N) |                                                    | SENS | SPEC | ACCUR | AUC  |
|--------------|----------------------------------------------------|------|------|-------|------|
| PD_DEM (12)  | miR-7 / miR-146a                                   | 0.63 | 0.75 | 0.66  | 0.77 |
|              | miR-206 / miR-9                                    | 0.74 | 0.58 | 0.7   | 0.76 |
|              | miR-7 / miR-9                                      | 0.66 | 0.75 | 0.68  | 0.81 |
|              | miR-7 / miR-128a                                   | 0.71 | 0.67 | 0.7   | 0.79 |
|              | miR-107 / miR-9                                    | 0.61 | 0.75 | 0.64  | 0.79 |
|              | miR-7 / miR-146a + miR-7 / miR-9 + miR-107 / miR-9 | 0.71 | 0.67 | 0.7   | 0.84 |

C. Differentiation of ALS-FTD (8 participants) from other ALS patients.

| Subgroup (N) |                                                            | SENS | SPEC | ACCUR | AUC  |
|--------------|------------------------------------------------------------|------|------|-------|------|
| ALS-FTD (8)  | miR-129-3p / miR-874                                       | 0.66 | 0.75 | 0.67  | 0.76 |
|              | miR-29a / miR-9*                                           | 0.57 | 0.63 | 0.58  | 0.78 |
|              | miR-146a / miR-9                                           | 0.62 | 0.75 | 0.64  | 0.78 |
|              | miR-491-5p / let-7e                                        | 0.61 | 0.63 | 0.61  | 0.76 |
|              | miR-218 / miR-451                                          | 0.57 | 0.63 | 0.58  | 0.75 |
|              | miR-218 / miR-451 + miR-29a / miR-9* + miR-491-5p / let-7e | 0.74 | 0.88 | 0.76  | 0.96 |

**Additional file 8. Differentiation of ND subgroups from other research participants with the same ND**
