# Supplementary material for: Circulating brain-enriched microRNAs as novel biomarkers for detection and differentiation of neurodegenerative diseases
Source: Springer Nature journal article supplement (doi:10.1186/s13195-017-0316-0), 2017-11-09
Supplement: MOESM3 [file 15210016]

| miRNA       | Brain enrichment | Enriched in brain regions/other | Present in synapses |
|-------------|------------------|---------------------------------|---------------------|
| Let-7e      | +                | <b>MB, PG</b> , Cer, FC         | +                   |
| miR-107     | +                | <b>FC</b> , Hip, MB, PG         | +                   |
| miR-125b    | +                | FC, MB, PG, Hip                 | +                   |
| miR-127-3p  | +                | <b>PG</b> , MB, FC              | N/D                 |
| miR-128a    | +                | Hip, FC, HPT                    | +                   |
| miR-129-3p  | +                | <b>FC, MB</b> , Hip, TL         | L/D                 |
| miR-133b    | -                | N/D; muscles                    | N/D                 |
| miR-134     | +                | MB, Hip, PG                     | +                   |
| miR-138     | +                | Brain-ubiquitous; axons         | +                   |
| miR-146a    | -                | N/D; inflammatory               | N/D                 |
| miR-155     | -                | N/D; inflammatory               | N/D                 |
| miR-16      | -                | PG; ubiquitous                  | L/D                 |
| miR-181a    | +                | MB, FC, Hip                     | L/D                 |
| miR-204     | +                | PG, MB, Hip                     | +                   |
| miR-206     | -                | Cer; muscles                    | L/D                 |
| miR-218     | +                | <b>Hip</b> , PG, SC             | +                   |
| miR-29a     | -                | PG, MB, FC, Hip                 | L/D                 |
| miR-31      | -                | N/D; inflammatory               | N/D                 |
| miR-323-3p  | +                | FC, MB                          | +                   |
| miR-329     | +                | <b>PG, MB</b>                   | L/D                 |
| miR-335a-5p | +                | <b>PG</b> , Hip                 | L/D                 |
| miR-338-3p  | +                | MB, FC, Hip, Cer, SC            | N/D                 |
| miR-370     | +                | GC, PG                          | +                   |
| miR-382     | +                | Hip, FC                         | +                   |
| miR-411     | +                | <b>PG</b> , FC, Hip             | L/D                 |
| miR-433     | +                | PG, MB                          | N/D                 |
| miR-451     | -                | PG, HPT, SC; ubiquitous         | N/D                 |
| miR-487b    | +                | <b>PG</b> , MB, FC              | L/D                 |
| miR-491-5p  | +                | <b>MB</b> , FC                  | +                   |
| miR-495     | +                | Hip                             | +                   |
| miR-539     | +                | MB, FC                          | N/D                 |
| miR-7       | +                | <b>PG</b> , FC, Hip             | +                   |
| miR-874     | +                | Cer, Hip                        | +                   |
| miR-9       | +                | FC, MB, Hip, Cer                | L/D                 |
| miR-99b     | +                | MB, PG, FC, Cer, Hip            | L/D                 |
| miR-181a-2* | +                | N/D                             | +                   |
| miR-9*      | +                | MB, Cer, Hip, FC                | +                   |

### Additional file 3. miRNAs analyzed in the study

Cer – Cerebellum; FC – Frontal Cortex; Hip – Hippocampus; HPT – Hypothalamus; MB – Midbrain; PG – Pituitary Gland, TL – Temporal lobe, SC – Spinal cord. **Bold** indicates regions of maximal enrichment. L/D – Limited or contradictory data, N/D – No data.
